# Supplementary material for: Tuning the cellulose nanocrystal alignments for supramolecular assembly of chiral nematic films with highly efficient UVB shielding capability
Source: Royal Society of Chemistry journal article supplement (doi:10.1039/d0tc01626h), 2020-01-01
Supplement: d0tc01626h1.pdf [file d0tc01626h1.pdf]

**SUPPORTING INFORMATION for**

**Tuning cellulose nanocrystals alignments for supramolecular assembly  
of chiral nematic films with highly efficient UVB shielding capability**

Zhe Ling,<sup>a</sup> Kaili Wang,<sup>b</sup> Wanying Liu,<sup>a</sup> Wei Tang,<sup>a</sup> and Qiang Yong<sup>a\*</sup>

<sup>a</sup> Jiangsu Co-Innovation Center of Efficient Processing and Utilization of Forest

Resources, College of Chemical Engineering, Nanjing Forestry University, Nanjing

210037, China

<sup>b</sup> College of Materials Science and Engineering, Nanjing Forestry University, Nanjing

210037, China

\*Corresponding author: Qiang Yong

E-mail: [swhx@njfu.com.cn](mailto:swhx@njfu.com.cn)

**Fig. S1**

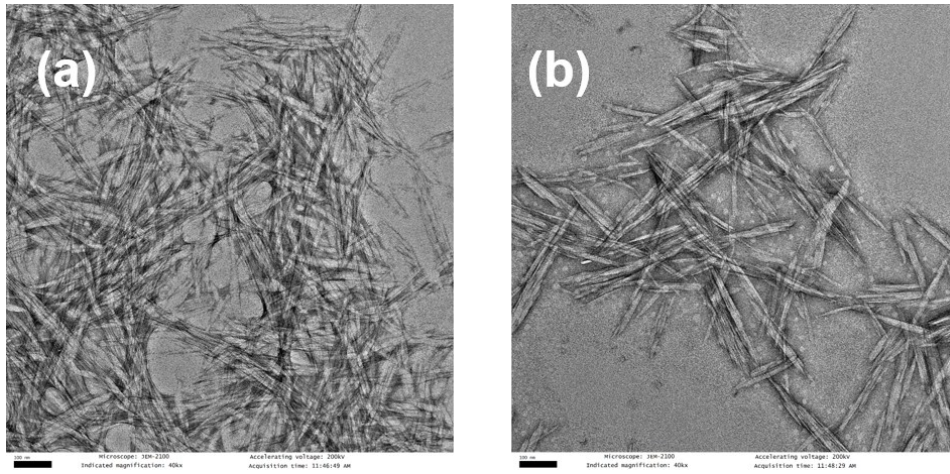

**Fig. S1** The TEM images of CNCs and CNSP-X1 suspensions. Scale bar = 100 nm.

Morphology of nanoparticles were not affected by SP and Xyl modification. However, Xyl tuned CNSP samples tended to aggregate, which will affect the self-assembled cholesteric organization after evaporation.

**Fig. S2**

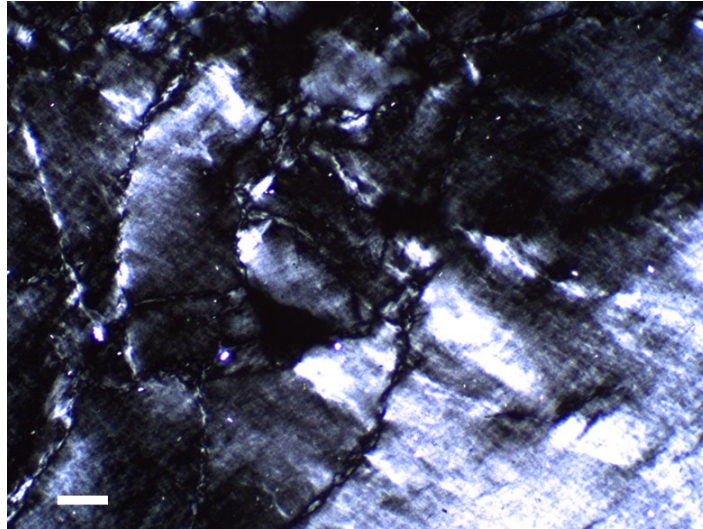

**Fig. S2** The phase transition and self-assembly behavior of CNCs during the evaporation process under the polarized light. Scale bar = 100  $\mu\text{m}$ .

The evaporation of CNC is a key process for self-assembly of the film, which is sensitive to temperature, pH, humidity and many other factors. It is shown that the phase is changing from dark to bright during the process, and iridescence color as illustrated in main text will appear afterwards.

**Table S1.** The degree of esterification for CNCs nanocomposites films determined by peaks deconvolution of FTIR spectra.

|         | Area of ester carboxyl peak (1844-1682 cm <sup>-1</sup> ) | Area of non-ester carboxyl Peak (1682-1532 cm <sup>-1</sup> ) | Degree of esterification Ae/(Ae+An) |
|---------|-----------------------------------------------------------|---------------------------------------------------------------|-------------------------------------|
|         | Ae                                                        | An                                                            |                                     |
| CNC     | 0.0049                                                    | 0.0283                                                        | 14.76%                              |
| CNSP    | 0.0132                                                    | 0.0157                                                        | 45.68%                              |
| CNSP-X1 | 0.0233                                                    | 0.0370                                                        | 38.69%                              |
| CNSP-X2 | 0.0296                                                    | 0.0437                                                        | 40.38%                              |
| CNSP-X5 | 0.0238                                                    | 0.0359                                                        | 39.91%                              |

**Table S2.** The crystal structure data (crystallinity, d-spacings and crystallites perpendicular to major lattice planes) of CNCs nanocomposites films determined by Rietveld analysis.

|         | CrI (%) | d-spacing (Å) |       |       | Crystallite size (nm) |       |       |
|---------|---------|---------------|-------|-------|-----------------------|-------|-------|
|         |         | (1-10)        | (110) | (200) | (1-10)                | (110) | (200) |
| CNC     | 94.8    | 6.0           | 5.4   | 3.9   | 6.07                  | 6.14  | 6.14  |
| CNSP    | 97.6    | 6.0           | 5.4   | 3.9   | 6.14                  | 6.16  | 6.20  |
| CNSP-X1 | 86.7    | 6.0           | 5.5   | 3.9   | 7.88                  | 5.07  | 6.04  |
| CNSP-X2 | 82.5    | 6.1           | 5.5   | 4.0   | 7.34                  | 5.16  | 6.48  |
| CNSP-X5 | 87.5    | 6.0           | 5.4   | 3.9   | 6.29                  | 5.97  | 5.76  |

**Fig. S3**

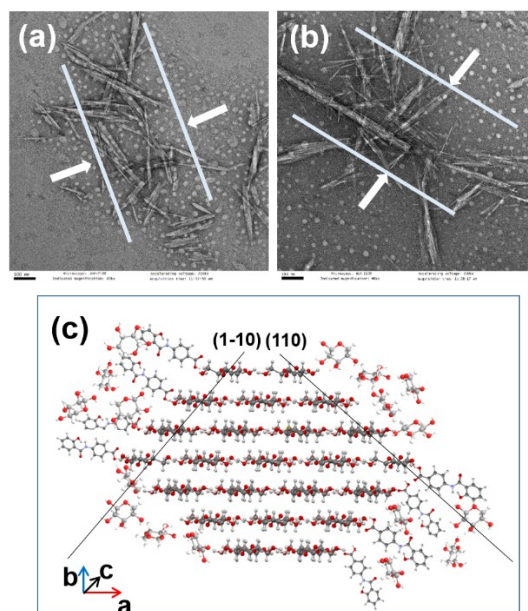

**Fig. S3** The TEM images of CNSP-X2 (a) and CNSP-X5 (b) nanoparticles aggregating during the evaporation; The crystallite model for the interactions of cellulose with SP and Xyl (c).

Fig. S4

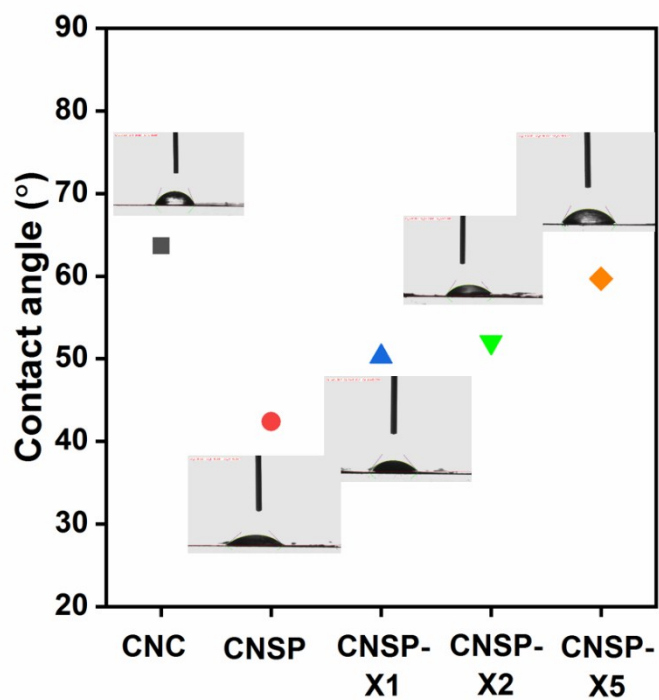

**Fig. S4** The water contact angle of CNCs nanocomposite films.

The CNC based films all showed hydrophilicity on the surface. Compared to raw CNC, CNSP had low water contact angle mainly derived from more carboxyl groups from SP. Tuning by Xyl improved the water contact angle though they were still within hydrophilic range.
